# Supplementary material
Source: PubMed Central journal article supplement (PMC3186415)
Supplement: supp_M111.281642_jbc.M111.281642-1.pdf [file supp_M111.281642_jbc.M111.281642-1.pdf]

## SUPPLEMENTAL FIGURES AND LEGENDS

### Supplemental movie legend

Supplemental Movie S1. A representative approach-contact-retraction cycle of a PMN moving inside a micropipette. A WM9 melanoma cell was held steadily by a micropipette on the right side.

### Supplemental figures

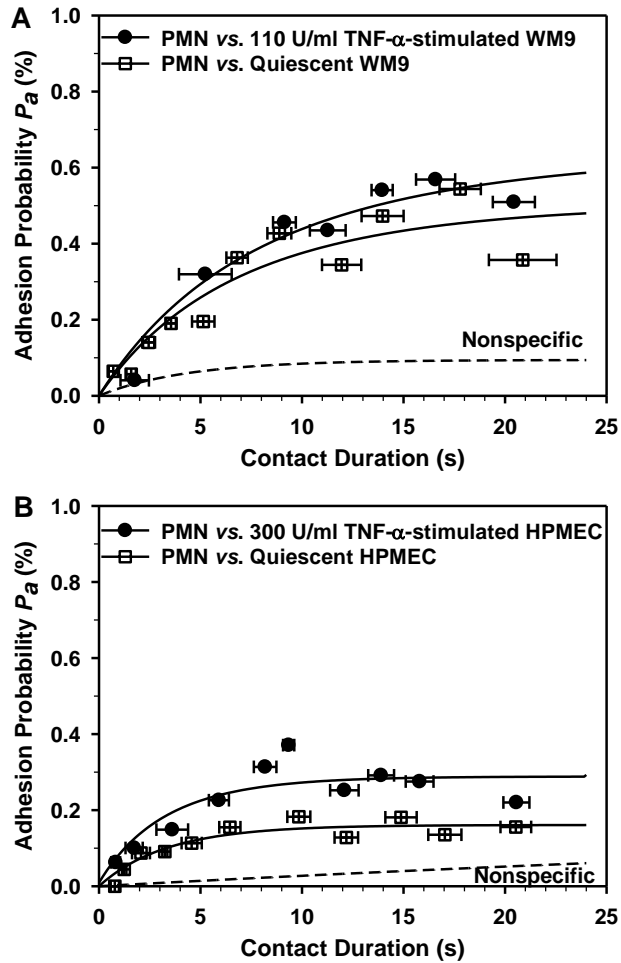

Supplemental Fig. S1. Binding curves of PMN-WM9 (A) and PMN-HPMEC (B) adhesions when WM9 or HPMEC cells were quiescent (*squares*) or pre-incubated by TNF- $\alpha$  (*circles*). Data were binned per contact event upon similar contact durations and presented as the means  $\pm$  SEs of contact durations. Also plotted were the predictions fitted using Eq. 1 (*solid lines*) while the *dashed lines* represented nonspecific binding, obtained by fitting Eq. 1 to nonspecific data (not shown for the sake of clarity).

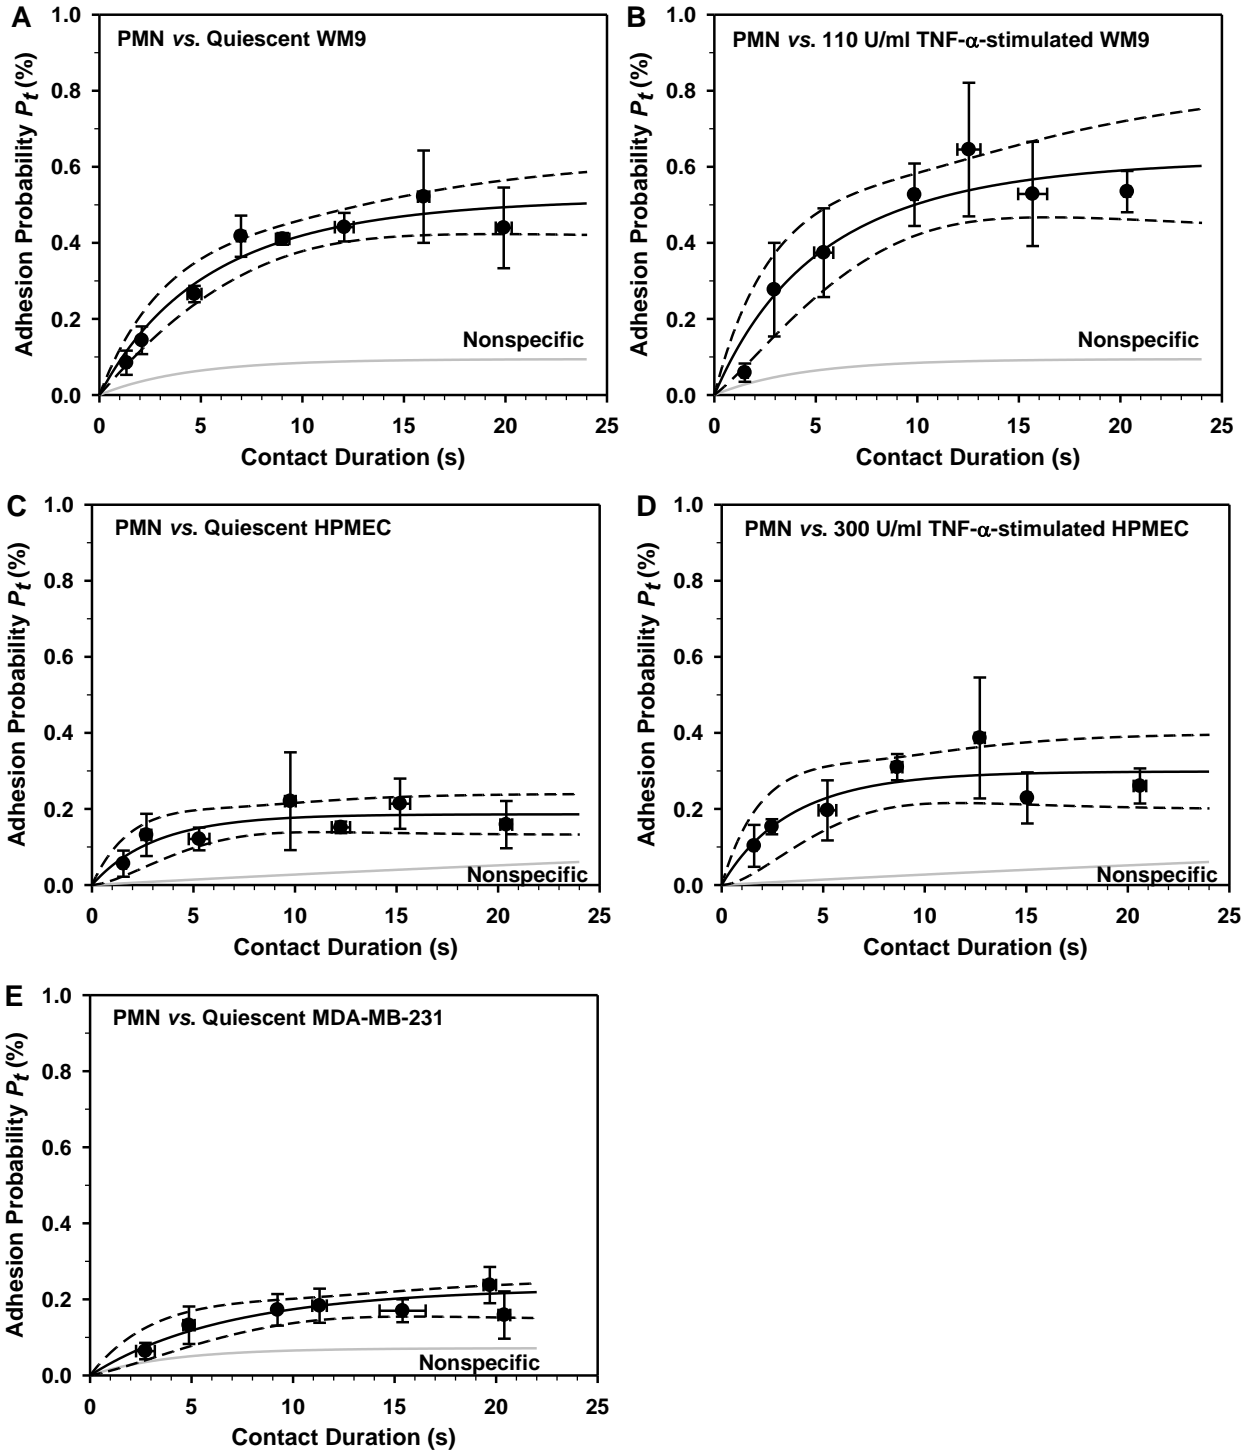

Supplemental Fig. S2. The 95% confidence intervals (*dashed lines*) of the best fitted curves (*solid lines*) from experimental data (*points*) for PMN vs. quiescent (A) and TNF- $\alpha$ -stimulated WM9 (B), PMN vs. quiescent and TNF- $\alpha$ -stimulated HPMEC (D), and PMN vs. quiescent MDA-MB-231 (E). The nonspecific bindings were presented by *grey lines*.
